# Supplementary material
Source: Springer Nature journal article supplement (https://www.springermedizin.de/resource/supplementary/13058_2013_3583_MOESM18_ESM.pdf/9703864)
Supplement: MOESM18 [file 9703864]

Table 5. Targeted Q-PCR analysis of intact mammary glands and epithelium-devoid fat pads after 3 or 4 weeks on HFD vs. LFD

A Inflammation Array

| Gene  | Fold change HFD vs. LFD |               |              |               |
|-------|-------------------------|---------------|--------------|---------------|
|       | 3 wks intact            | 3 wks cleared | 4 wks intact | 4 wks cleared |
| Ccl24 | 2.7                     | -             | -            | -             |
| RANKL | -                       | -             | 17           | -             |
| Ccl3  | 2.3                     | -             | -            | -             |
| Il4   | 2.2                     | -             | -            | -             |
| Il5ra | 3.0                     | 3.3           | -            | -             |
| Il1f6 | -                       | -             | -            | 6.5           |
| Il1f8 | -                       | -             | -            | 4.9           |

B Angiogenesis Array

| Gene  | Fold change HFD vs. LFD |               |              |               |
|-------|-------------------------|---------------|--------------|---------------|
|       | 3 wks intact            | 3 wks cleared | 4 wks intact | 4 wks cleared |
| Hand2 | 2.9                     | -             | -            | -             |
| Fzd5  | -                       | -             | 2.0          | 2.1           |

N=3 HFD mice, N=3 LFD mice  
 $p \leq 0.05$  for all genes listed
